# Systematic Review and Meta-Analysis on the Association between Outpatient Statins Use and Infectious Disease-Related Mortality

Yu Ma<sup>1</sup>, Xiaozhong Wen<sup>2</sup>, Jing Peng<sup>3</sup>, Yi Lu<sup>4</sup>, Zhongmin Guo<sup>5\*</sup>, Jiahai Lu<sup>1\*</sup>

**1** Department of Epidemiology and Biostatistics, School of Public Health, Key Laboratory of Tropical Diseases Control Research, Ministry of Education, Sun Yat-sen University, Guangzhou, Guangdong Province, PR China, **2** Department of Population Medicine, Harvard Medical School and Harvard Pilgrim Health Care Institute, Boston, Massachusetts, United States of America, **3** Department of Epidemiology and Biostatistics, School of Public Health, Sun Yat-sen University, Guangzhou, Guangdong Province, PR China, **4** School of Public Health and Tropical Medicine, Southern Medical University, Guangzhou, Guangdong Province, PR China, **5** Laboratory Animal Center, Sun Yat-Sen University, Guangzhou, Guangdong Province, PR China

## Abstract

**Background:** To update and refine systematic literature review on the association between outpatient statins use and mortality in patients with infectious disease.

**Materials and Methods:** We searched articles published before September 31, 2012, on the association between statins and infectious disease-related mortality through electronic databases. Eligible articles were analyzed in Review Manager 5.1. We conducted stratification analysis by study design, infection types, clinical outcomes and study locations.

**Results:** The pooled odds ratio (OR) for death (statins use vs. no use) across the 41 included studies was 0.71 (95% confidence interval: 0.64, 0.78). The corresponding pooled ORs were 0.58 (0.38, 0.90), 0.66 (0.57, 0.75), 0.71 (0.57, 0.89) and 0.83 (0.67, 1.04) for the case-control study, retrospective cohort studies, prospective cohort studies and RCTs; 0.40 (0.20, 0.78), 0.61 (0.41, 0.90), 0.69 (0.62, 0.78) and 0.86 (0.68, 1.09) for bacteremia, sepsis, pneumonia and other infections; 0.62 (0.534, 0.72), 0.68 (0.53, 0.89), 0.71 (0.61, 0.83) and 0.86 (0.70, 1.07) for 30-day, 90-day, in-hospital and long-term (>1 year) mortality, respectively.

**Conclusions:** Outpatient statins use is associated with a lower risk of death in patients with infectious disease in observational studies, but in a less extent in clinical trials. This association also varies considerably by infection types and clinical outcomes.

**Citation:** Ma Y, Wen X, Peng J, Lu Y, Guo Z, et al. (2012) Systematic Review and Meta-Analysis on the Association between Outpatient Statins Use and Infectious Disease-Related Mortality. PLoS ONE 7(12): e51548. doi:10.1371/journal.pone.0051548

**Editor:** Benjamin J. Cowling, University of Hong Kong, Hong Kong

**Received:** June 18, 2012; **Accepted:** November 2, 2012; **Published:** December 17, 2012

**Copyright:** © 2012 Ma et al. This is an open-access article distributed under the terms of the Creative Commons Attribution License, which permits unrestricted use, distribution, and reproduction in any medium, provided the original author and source are credited.

**Funding:** This project was supported by the Natural Science Foundation of China (NSFC) [grant No. 81172735] ([http://159.226.244.22/portal/Proj\\_List.asp](http://159.226.244.22/portal/Proj_List.asp)). The funders had no role in study design, data collection and analysis, decision to publish, or preparation of the manuscript.

**Competing Interests:** The authors have declared that no competing interests exist.

\* E-mail: [jiahailu@yahoo.com.cn](mailto:jiahailu@yahoo.com.cn) (JHL); [zhongminguo@yahoo.com.cn](mailto:zhongminguo@yahoo.com.cn) (ZMG)

## Introduction

Severe infections always remain a major cause of morbidity, mortality, and economic burden worldwide. For example, there are nearly 751,000 cases of sepsis in the United States each year and the number of cases is still increasing by 1.5% per year, resulting in an annual estimated cost of \$16.7 billions [1]. Despite new advances in antimicrobial therapy and medical management, only 50%–70% patients can survive from sepsis [2]. In addition, Pneumonia induced by influenza and chronic obstructive pulmonary disease (COPD) had caused thousands of deaths in several epidemics [3], such as 1918 influenza epidemic, Asia influenza during 1957–1958, Hong Kong influenza in 1968, and Spanish influenza in 1942.

Statins, as one of the inhibitors of 3-hydroxy-3-methylglutaryl coenzyme A reductase (HMG-CoA), are traditionally used to lower the level of blood cholesterol in patients with cardiovascular diseases or to prevent cardiovascular events. Recently, statins have

been proposed as novel therapeutic and preventive agents for infection, given the increasing evidence, mostly from observational studies, that statins are associated with a lower mortality in patients with infectious disease [4–7]. Researchers believe that statins can mitigate the inflammatory response in patients with sepsis or COPD, which reflects its anti-inflammatory and immunoregulation effects [8]. This may occur through several possible biological mechanisms. Firstly, statins block the mevalonate pathway by inhibiting HMG-CoA reductase, which interfere with the recognition of microbial products by immune cell. They can also decrease production of proinflammatory cytokines such as tumor necrosis factor  $\alpha$  (TNF- $\alpha$ ), interleukin1 (IL-1), and IL-6 present during sepsis and COPD, and thus depress the inflammatory cascade [9]. Secondly, the antioxidant and anti-apoptotic properties of statins blunt the effects of sepsis [10]. Thirdly, the antithrombotic properties of statins decrease the effect of sepsis-induced coagulopathy [11]. Finally, statins increase the physiologic concentrations of nitric oxide (NO) by increasing the expression of

endothelial NO synthase and down-regulating inducible NO synthase, and thus reverse the endothelial dysfunction in sepsis [12]. These pleiotropic effects of statins have been demonstrated in experimental models (in vitro and in vivo), and some [13–15] but not all studies [4,6,7,16,17] showed serendipitous benefits of statins to patients with severe infections, such as sepsis and COPD. However, it is unclear which of them can explain the association between statins and lower infectious disease-related mortality observed in clinical observational studies.

So far, there are 4 published systematic reviews (3 of them are quantitative analyses) on the studies on the association between statins and infectious disease-related mortality [18–21]. Tleyjeh et al. [18] reviewed 9 cohort studies published as of 2007 that examined the effect of statins on infection-related mortality by bacteremia ( $n = 3$ ), pneumonia ( $n = 3$ ), sepsis ( $n = 2$ ), and bacterial infection ( $n = 1$ ). The pooled effect estimate (odds ratio or hazard ratio of mortality) was 0.55 (95% CI, 0.36–0.83) in favor of statins. Kopterides et al. [19] reviewed 15 studies published as of 2008 that examined statins and infection-related mortality: 10 of them reported protective effects of statins, 4 showed null effects, and 1 showed risk/adverse effects. Janda et al. [20] reviewed 20 studies on severe infections and sepsis published as of 2009. Among them, 15 studies reported protective effects of statins [4,7,13–15,22–31]: 7 ones on 30-day mortality (OR, 0.61 [95% confidence interval or CI, 0.48–0.73]), 7 ones on in-hospital mortality (OR, 0.38 [95% CI, 0.13–0.64]). Bjorkhem et al. [21] reviewed 15 observational studies comprising 113 910 patients between 2001 and 2009, and found statin use was associated with a significantly ( $P < 0.0001$ ) reduced mortality in patients suffering from bacterial infections (OR, 0.52 [95% CI, 0.42–0.66]) but no longer significant after adjusting for publication bias by precision estimate test (OR, 0.79, [5% CI, 0.58–1.07]). However, these systematic reviews have not sufficiently addressed the 3 critical challenges in this field: potential time-varying effects of statins, the differential effects of statins by types of infections, conflicting by results in different study design. Answers to these 3 questions have important implications: they can help us to better interpret (e.g. causality) on the observed associations, and can also influence how physicians, patients, and public health policy makers use the existing evidence. Moreover, only 1 randomized clinical trial (RCT) was included in previous reviews. Given the high validity of RCTs, it is important to include more recently published RCTs into the review/meta-analysis to provide a more conclusive interpretation on the potential effects of statins on infectious disease-related mortality.

Therefore, this meta-analysis aimed 1) to update the literature as of September 2012; 2) to summarize the association between outpatient statins use and infectious disease-related mortality across all published studies (observational studies and RCTs); 3) to examine whether this association differ by study design, infection types, outcome measures and study locations.

## Methods

The systematic review and meta-analysis was performed according to the recently published recommendations and checklist of the Preferred Reporting Items for Systematic Reviews and Meta-Analyses (PRISMA) statement.

## Search Strategy

All searches were limited to “English language” and “humans”. Two researchers conducted literature search independently in 4 steps. Step 1, we searched abstracts of published articles in English language through Pubmed, Ovid MEDLINE, and Ovid EMBASE databases, using the following key terms: (statin OR statins OR

mevastatin OR simvastatin OR lovastatin OR fluvastatin OR rosuvastatin OR cerivastatin OR pravastatin OR atorvastatin OR hydroxymethylglutaryl-CoA Reductase Inhibitors) AND (infection OR sepsis OR bacteremia OR pneumonia OR virus infectious diseases OR respiratory tract infections OR organ transplantation OR). The final date of literature search was September 31 2012. Step 2, we excluded reviews, letter, comments, editorials, corrected publications, duplicate publications and abstracts only. Step 3, we screened all the remaining abstracts and selected those that met our eligibility criteria (see exclusion criteria below). Step 4, we searched the full-text articles of these eligible abstracts.

## Study Selection

Our included surveillance studies, cohort studies, case-control studies, and RCTs that focused on statins and infectious diseases. Infectious diseases in this Meta-analysis included phenomena, COPD, sepsis, bacteremia, respiratory infection, organ transplantation or any open surgery induced infection. Outpatient statins use was defined as use of statins before the admission or both before and during the hospitalization. We excluded studies that, 1) only focused on the preventive effects of statins on the incidence of infectious disease; 2) only had information on statins use during the hospitalization for observational study; 3) did not provide clear definition of statins use; 4) had no outcome measures for infection-related mortality.

## Data Extraction and Quality Assessment

Two researchers (Ma Y and Peng J) independently reviewed the included studies and used the same Excel spreadsheet to extract relevant information of each study, including study objective, sample demographics (i.e. age, gender), comorbidities, type of infection, timing and dose of statins use, use of other medications or treatments, outcome measures (30-day, 90-day, in hospital and long-term mortality), association scale (OR or HR), and adjusted confounders. Disagreement between the 2 reviewers was first resolved by consensus. If consensus could not be reached, a senior reviewer (Guo Z) was consulted for the final decision. For observational studies, we used Newcastle-Ottawa Quality Assessment Scale (NOS) [32] to assess their quality. NOS has 8 questions reflecting 3 domains: quality of subject selection, comparability between two groups, and reliability of exposure or clinical outcomes. The full score of NOS is 9, and a score 8–9 is rated as excellent, 6–7 as good, 5 or below as fair. For clinical trials, we used Jadad Score [33] with 3 questions to assess the quality of randomization, blinding, and withdrawals or dropouts. The full Jadad Score is 5, with 3–5 being rated as high quality and 1 or 2 as low quality.

## Statistical Analysis

We conducted quantitative data analyses in Review Manager 5.1 (StataCorp, College Station, Tex). We used  $I^2$  statistic to test heterogeneity across the included studies. An  $I^2$  value of 0% indicates absence of heterogeneity, while 25%, 50%, and 75% indicates low, moderate, and high heterogeneity, respectively [34]. Random effects model was used for high level of heterogeneity and fix effects model was used for low and moderate levels of heterogeneity. We estimated pooled odds ratio (OR) and the corresponding 95% confidence interval (CI) across studies by weighting the Odds ratios of each individual study according to their log-transformed inverse variance. We also conducted subgroup analyses by study design, infection types, outcome measures (30-day, 90-day, in-hospital mortality and long-term mortality), and study locations (grouped by continents). Whenever possible, we used the adjusted OR instead of the crude OR to

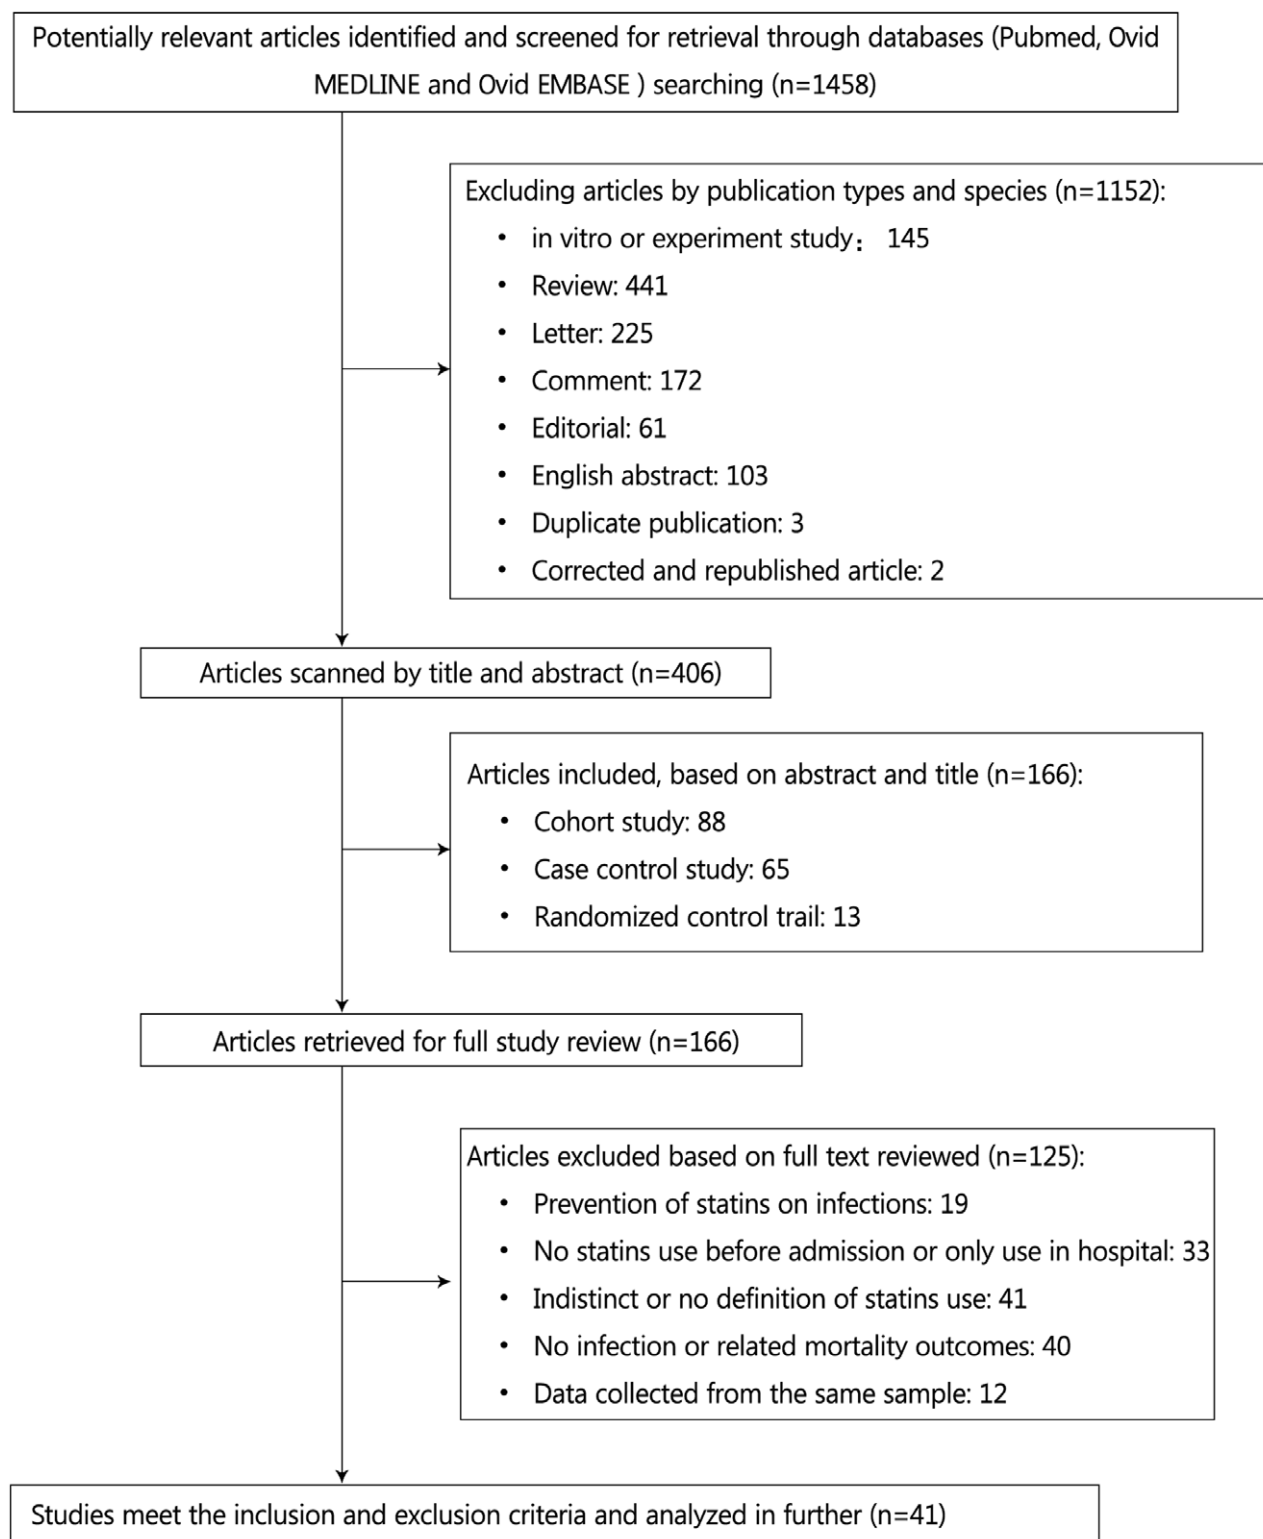

**Figure 1. Flowchart of included studies and selection progress.**

doi:10.1371/journal.pone.0051548.g001

calculate pooled ORs. We conducted sensitivity analysis with fail-safe number (Nfs) to calculate the number of negative studies needed to get opposite association between statins and mortality in patient with infectious disease. We also excluded single study or

groups of studies based on the study design, outcomes, and quality score; re-ran the analysis to get new pooled ORs; and then compared the new pooled ORs with the original OR for all studies. This comparison can help to evaluate the appropriateness

**Table 1.** Characteristics of 41 included studies.

| Author<br>(study year)             | Type of infection                | Study design     | Country       | Study settings                                     | Sample size                          |                                          | Mean age      | Sex ratio<br>(male : female) |
|------------------------------------|----------------------------------|------------------|---------------|----------------------------------------------------|--------------------------------------|------------------------------------------|---------------|------------------------------|
|                                    |                                  |                  |               |                                                    | Statin user                          | Non-user                                 |               |                              |
| Martin [2]<br>(2003–2004)          | sepsis                           | RC               | U.S.A         | University Hospital and Health System              | 16                                   | 37                                       | 59.5          | 1.52:1                       |
| Frost [4]<br>(1992–2003)           | Influenza and COPD               | MRC <sup>3</sup> | U.S.A         | Health data library (LPD and HMO)                  | 19,058                               | 57,174                                   | Not mentioned | 1.09:1                       |
| Kruger [5]<br>(2000–2003)          | bacteremia                       | RC <sup>2</sup>  | Oceania       | 2 hospital                                         | 66 <sup>a</sup><br>56 <sup>b</sup>   | 372                                      | Not mentioned | Not mentioned                |
| Thomsen 2006 [6]<br>(1997–2004)    | bacteremia                       | PC <sup>1</sup>  | Denmark       | population-based health registries                 | 176                                  | 5,177                                    | 72            | 1.21:1                       |
| Majumdar [7]<br>(2000–2002)        | pneumonia                        | PC <sup>1</sup>  | Canada        | 6 local hospital                                   | 325                                  | 3,090                                    | 75            | 1.12:1                       |
| Mortensen 2007 [13]<br>(2000)      | sepsis                           | RC <sup>2</sup>  | U.S.A         | Veterans Affairs health care networks              | 480                                  | 2471                                     | 74.4          | 69.19:1                      |
| Mortensen 2008 [14]<br>(1999–2000) | pneumonia                        | RC <sup>2</sup>  | North America | Health data library                                | 3,728                                | 4,924                                    | 75.2          | 1:1.44                       |
| Liappis [15]<br>(1995–2000)        | bacteremia                       | RC <sup>2</sup>  | U.S.A         | Veterans' Affairs Medical Center in Washington, DC | 35                                   | 353                                      | 63            | 193:1                        |
| Myles [16]<br>(2001–2002)          | pneumonia                        | RC <sup>2</sup>  | Britain       | Health data library                                | 357                                  | 3,324                                    | >40           | Not mentioned                |
| Yende [17]<br>(2001–2003)          | CAP and sepsis                   | MC <sup>4</sup>  | U.S.A         | 28 hospitals in 4 cities                           | 426 <sup>a</sup><br>354 <sup>b</sup> | 1,469 <sup>a</sup><br>1,541 <sup>b</sup> | 67.25         | 1.08:1                       |
| Chalmers [22]<br>(2005–2007)       | pneumonia                        | PC <sup>1</sup>  | Britain       | NHS Lothian University Hospitals                   | 257                                  | 750                                      | 66            | 1:1.01                       |
| Dobesh [23]<br>(2005–2006)         | sepsis                           | RC <sup>2</sup>  | U.S.A         | ICU in teaching hospitals                          | 60                                   | 128                                      | 66.5          | 1.14:1                       |
| Donnino [24]<br>(2003–2004)        | Emergency infection              | PC <sup>1</sup>  | U.S.A         | Emergency department                               | 474                                  | 1562                                     | 61            | 1:1.07                       |
| Schlenger [25]<br>(1995–2002)      | pneumonia                        | NCC <sup>5</sup> | Britain       | based database (GPRD)                              | 156                                  | 412                                      | Not mentioned | 1.18:1                       |
| Hsu [26]<br>(1995–2006)            | Organ transplantation infection  | RC <sup>2</sup>  | U.S.A         | University of Wisconsin                            | 80                                   | 231                                      | 51            | 187:124                      |
| Mortensen 2005 [27]<br>(1999–2002) | pneumonia                        | RC <sup>2</sup>  | U.S.A         | 2 academic tertiary care hospitals                 | 110                                  | 677                                      | 60            | 3.74:1                       |
| Almog [28]<br>(2001–2003)          | infection                        | PC <sup>1</sup>  | Israel        | School medicine center                             | 5,698                                | 5,664                                    | 65            | 1.70:1                       |
| Thomsen 2008 [29]<br>(1997–2004)   | pneumonia                        | RC               | Denmark       | Medical record library                             | 1,371                                | 28,529                                   | 73            | 1:2.39                       |
| Tseng [30]<br>(2004)               | sepsis (subarachnoid hemorrhage) | Clinical trial   | Britain       | Addenbrooke's Hospital                             | 40                                   | 40                                       | 52.9          | 1:1.22                       |
| Schmidt [36]<br>(2006)             | MODSE infection                  | MRC <sup>3</sup> | Germany       | ICU in teaching hospital                           | 40                                   | 80                                       | 64.6          | 2.63:1                       |
| Douglas [37]<br>(1995–2006)        | pneumonia                        | RC <sup>2</sup>  | Britain       | Health data library                                | 942                                  | 3,615                                    | 65            | Not mentioned                |
| Kwong [38]<br>(1996–2006)          | Influenza                        | MRC <sup>3</sup> | Canada        | 4 health data library                              | 1,120,319                            | 1,120,319                                | 74.34         | 82.157:1                     |

Table 1. Cont.

| Author<br>(study year)             | Type of infection                   | Study design     | Country                       | Study settings                                                         | Sample size                              |          | Mean age      | Sex ratio<br>(male : female) |
|------------------------------------|-------------------------------------|------------------|-------------------------------|------------------------------------------------------------------------|------------------------------------------|----------|---------------|------------------------------|
|                                    |                                     |                  |                               |                                                                        | Statin user                              | Non-user |               |                              |
| Fernandez [39]<br>(2002–2004)      | ICU infection                       | RC <sup>2</sup>  | Spain                         | Medical-surgical ICU                                                   | 38                                       | 400      | 62.38         | 2.33:1                       |
| Yang [40]<br>(2001–2002)           | sepsis                              | RC               | Taiwan                        | Hospital of Taiwan University                                          | 104                                      | 350      | 64.23         | 1.20:1                       |
| Luc de Saint [41]<br>(2009)        | acute infection                     | PC <sup>1</sup>  | France                        | One tertiary health center                                             | 139                                      | 782      | 71.65         | 1.13:1                       |
| Fellstrom [42]<br>(2005–2011)      | multiple infection                  | RCT <sup>6</sup> | U.S.A                         | 280 centers in 25 countries                                            | 1,389                                    | 1,384    | 64            | 1.64:1                       |
| Kjekshus [43]<br>(2003–2007)       | Infection                           | RCT              | U.S.A                         | Several hospitals                                                      | 2,514                                    | 2,497    | 73            | 3.25:1                       |
| Hollis R. [44]<br>(2006–2008)      | sepsis                              | PC <sup>1</sup>  | U.S.A                         | From VALID study                                                       | 149                                      | 426      | 59.07         | 1.28:1                       |
| Sharon [45]<br>(2008–2009)         | bloodstream infection               | RC <sup>2</sup>  | U.S.A                         | 2 hospital                                                             | 447                                      | 458      | 69.76         | 1.04:1                       |
| GISSI [46]<br>(2002–2008)          | multiple infection                  | RCT              | U.S.A                         | Fom GISSI-HF trial                                                     | 2,285                                    | 2,289    | 68            | 3.43:1                       |
| Wanner [47]<br>(2000–2004)         | Infection from hemodialysis         | RCT              | Germany                       | 178 centers                                                            | 619                                      | 636      | 66            | 1.17:1                       |
| Holdaas [48]<br>(1997–2003)        | Infection                           | RCT              | Northern Europe<br>and Canada | 84 centers                                                             | 1,050                                    | 1,052    | 48            | 1.97:1                       |
| Seruyys [49]<br>(1996–1998)        | Infection                           | RCT              | Europe, Canada,<br>Brazil     | 57 interventional centers in<br>10 countries                           | 844                                      | 833      | 60            | 5.19:1                       |
| Stegmayr [50]<br>(1998–2000)       | Infection<br>(severe renal failure) | RCT (not blind)  | Sweden                        | Not mentioned                                                          | 70                                       | 73       | 68            | 2.33:1                       |
| Michael B. [51]<br>(2003–2005)     | Pneumonia                           | RC <sup>2</sup>  | USA                           | 376 acute care facilities in the<br>US                                 | 23,285                                   | 97,969   | 74            | 1:1.28                       |
| Nielsen [52]<br>(1997–2009)        | Pneumonia                           | PC <sup>1</sup>  | Denmark                       | Danish patient registration<br>system and civil registration<br>system | 7,223 <sup>c</sup><br>1,903 <sup>d</sup> | 61,827   | Not mentioned | 1.131:1                      |
| Vandermeer [53]<br>(2007–2008)     | Influenza                           | surveillance     | USA                           | 59 counties in 10 states                                               | 1013                                     | 2030     | 70.4          | 1:1.27                       |
| Brett [54]<br>(2009–2010)          | Influenza A                         | RCC <sup>7</sup> | UK                            | 75 hospitals in 31 cities                                              | 477                                      | 94       | 52            | 1:1.27                       |
| Sever [55]<br>(2000–2010)          | Infection/respiratory illness       | RCT              | UK                            | multicenter                                                            | 2234                                     | 2198     | Not mentioned | Not mentioned                |
| Mortensen 2009 [56]<br>(1998–2000) | COPD exacerbation                   | RC <sup>2</sup>  | USA                           | Veterans Affairs administrative<br>data                                | 4,711                                    | 6,501    | 74            | 49:1                         |
| Makris [57]<br>(2008–2010)         | ICU infection                       | RCT              | Greece                        | 2 centers                                                              | 71                                       | 81       | 56            | 2.30:1                       |

**Type of study:** 1. perspective cohort study, 2. retrospective cohort study, 3. matched retrospective cohort study, 4. multicenter cohort study, 5. nested case control study, 6. randomized placebo controlled trials, 7. retrospective case-control study.

**Statins use:** a. prior use of statin, b. continued use of statin, c. current user d. former user.

doi:10.1371/journal.pone.0051548.t001

**Table 2.** Definitions of exposure, outcomes, adjusted confounders, and quality score of 41 included studies.

| Author                          | Exposure                                                                                                                                                                                                                                                            | Mortality outcome              | Adjusted OR/HR (95% CI)                                                                                                              | Adjust confounders | Quality score |
|---------------------------------|---------------------------------------------------------------------------------------------------------------------------------------------------------------------------------------------------------------------------------------------------------------------|--------------------------------|--------------------------------------------------------------------------------------------------------------------------------------|--------------------|---------------|
| Martin [2] (2003–2004)          | had been taking statins before admission                                                                                                                                                                                                                            | in-hospital                    | 0.63 (0.19, 2.07)                                                                                                                    | 1, 2, 5, 14, 9     | 8             |
| Frost [4] (1992–2003)           | Individuals with at least 90 days of cumulative statin exposure prior to death or disenrollment [low daily dose (<4 mg/d) and moderate daily dose (>4 mg/d)]                                                                                                        | influenza/pneumonia related    | 0.60 (0.34–1.06)<br>0.73 (0.47–1.13)                                                                                                 | 2,6,5,13           | 9             |
| Kruger [5] (2000–2003)          | statin was continued used during admission                                                                                                                                                                                                                          | bacteremia related in-hospital | 0.29 <sup>st</sup> (0.10–0.86)<br>0.09 <sup>ed</sup> (0.01–0.64)<br>0.39 <sup>ft</sup> (0.17–0.91)<br>0.06 <sup>co</sup> (0.01–0.44) | 1,5,12             | 7             |
| Thomsen 2006 [6] (1997–2004)    | current statin use as at least 1 filled prescription within 125 days before the hospitalization with pneumonia. Patients who filled at least 1 statin prescription more than 125 days before the hospitalization were classified as former statin users.            | 30-days                        | 0.93 (0.66–1.30)                                                                                                                     | 1,2,3,5,16         | 9             |
| Majumdar [7] (2000–2002)        | taken for at least one week before admission to hospital and continued during hospital stay                                                                                                                                                                         | in-hospital                    | 1.10 (0.76–1.60)                                                                                                                     | 1,2,3              | 8             |
| Mortensen 2007 [13] (2000)      | received at least one active and filled prescription within 90 days of admission                                                                                                                                                                                    | 30-days                        | 0.48 (0.36–0.64)                                                                                                                     | 1,2,3,5            | 8             |
| Mortensen 2008 [14] (1999–2000) | received at least one active and filled medication within 90 days of admission                                                                                                                                                                                      | 30-days                        | 0.58 (0.42–0.80)                                                                                                                     | 1,2,18,5,6,17      | 8             |
| Liappis [15] (1995–2000)        | taking a statin at the time of admission and continued use of statin throughout the course of hospitalization                                                                                                                                                       | bacteremia related all cause   | 0.13 (0.02–0.99)                                                                                                                     | 1,3,5,10,11,12     | 7             |
| Myles [16] (2001–2002)          | Current exposure: when the most recent prescription was within 30 days before the pneumonia index date<br>Recent exposure: Prescriptions within 31–90 days before the index date<br>Past exposure: any prescriptions dating more than 90 days before the index date | 30-days                        | 0.33 <sup>st</sup> (0.19–0.58)<br>0.58 <sup>st</sup> (0.34–0.99)<br>1.36 <sup>st</sup> (0.86–2.16)                                   | 1,2,4,5,6          | 9             |
|                                 |                                                                                                                                                                                                                                                                     | long-term                      | 0.45 <sup>st</sup> (0.32–0.62)<br>0.62 <sup>st</sup> (0.43–0.89)<br>1.13 <sup>st</sup> (0.77–1.65)                                   |                    |               |
| Yende [17] (2001–2003)          | Prior use: a history of statin use in the week before admission<br>Continued use: continued use of statin after admit of hospital                                                                                                                                   | 90-days                        | 0.90 <sup>st</sup> (0.63–1.29)<br>0.73 <sup>st</sup> (0.47–1.13)                                                                     | 1,2,3,6,7,8,18,19  | 9             |
| Chalmers [22] (2005–2007)       | Did not defined specifically                                                                                                                                                                                                                                        | 30-days                        | 0.46 (0.25–0.85)                                                                                                                     | 1,3,5,7            | 7             |
| Dobesh [23] (2005–2006)         | received any statin or statin combination product at the time of admission or had been prescribed one of those products during hospitalization.                                                                                                                     | in-hospital                    | 0.42 (0.21–0.84)                                                                                                                     | 1,2,9              | 9             |
| Donnino [24] (2003–2004)        | receive statin therapy during their inpatient hospital course                                                                                                                                                                                                       | in-hospital                    | 0.27 (0.1–0.72)                                                                                                                      | 2,6,7              | 8             |
| Schlienger [25] (1995–2002)     | received at least one prescription for a statin                                                                                                                                                                                                                     | fatal pneumonia related        | 0.47 (0.25–0.88)                                                                                                                     | 3,4,5,15           | 9             |
| Hsu [26] (1995–2006)            | use of statins within 30 days prior to BSI                                                                                                                                                                                                                          | 15-days                        | 0.18 (0.04–0.78)                                                                                                                     | 5,9,20             | 9             |
| Mortensen 2005 [27] (1999–2002) | had a statin listed on the electronic medical record (as an outpatient medication) or history and physical under outpatient medications.                                                                                                                            | 30-days                        | 0.36 (0.14–0.92)                                                                                                                     | 3,4,7,16           | 8             |
| Almog [28] (2001–2003)          | Individuals with at least 30 days of cumulative statin exposure prior to death or disenrollment                                                                                                                                                                     | 30-days infection-related      | 0.43 (0.13–1.38)                                                                                                                     | 1,2,3,5,6,14       | 9             |

**Table 2.** Cont.

| Author                        | Exposure                                                                                                                                                                                                                       | Mortality outcome              | Adjusted OR/HR (95% CI)       | Adjust confounders  | Quality score |
|-------------------------------|--------------------------------------------------------------------------------------------------------------------------------------------------------------------------------------------------------------------------------|--------------------------------|-------------------------------|---------------------|---------------|
| Thomsen 2008 [29] (1997–2004) | Current use: use as at least 1 filled prescription within 125 days before the hospitalization with pneumonia<br>Former use: filled at least 1 statin prescription more than 125 days before the hospitalization                | 30-days                        | 0.69 <sup>a</sup> (0.58–0.82) | 1,2,3,5,17,16       | 9             |
| Tseng [30] (2004)             | receive daily oral pravastatin (40 mg) or placebo for up to 14 days                                                                                                                                                            | 90-days                        | 0.75 <sup>b</sup> (0.65–0.86) |                     | 5             |
| Schmidt [36] (2006)           | Did not defined specifically                                                                                                                                                                                                   | 6-month                        | 0.12 (0.02, 0.69)             |                     | 7             |
| Douglas [37] (1995–2006)      | received a prescription for a statin in the 60 day period before pneumonia to be users                                                                                                                                         | 28-days                        | 0.53 (0.29–0.99)              | not adjusted        | 9             |
| Kwong [38] (1996–2006)        | received one or more prescriptions for a statin during the 90 days preceding the start of an influenza season                                                                                                                  | within 6 months                | 0.67 (0.49–0.91)              | 1,2,3               | 9             |
| Fernandez [39] (2002–2004)    | taking statins before ICU admission and continuing on statin therapy throughout the course of hospitalization (40 mg per day)                                                                                                  | 30-days                        | 0.90 <sup>a</sup> (0.82–0.98) | 1,2,3,5             | 9             |
| Yang [40] (2001–2002)         | took a statin at least 30 days before the sepsis episode and continued to receive statin therapy during the hospital course                                                                                                    | all-cause in influenza seasons | 0.91 <sup>c</sup> (0.88–0.94) |                     | 9             |
| Luc de Saint [41] (2009)      | patients under statin treatment at admission                                                                                                                                                                                   | ICU                            | 2.30 (1.08–4.89)              | 5,9,12              | 9             |
| Fellstrom [42] (2005–2011)    | Rosuvastatin 10 mg v placebo                                                                                                                                                                                                   | 30-days                        | 0.95 (0.53–1.68)              | 1,2,3,5,11,12,14    | 9             |
| Kjekshus [43] (2003–2007)     | Rosuvastatin 10 mg v placebo                                                                                                                                                                                                   | in-hospital                    | 0.98 (0.47–2.03)              | 1, 2, 12,           | 8             |
| Hollis R. [44] (2006–2008)    | patients on any type of prehospital statin therapy were grouped as “statin users”                                                                                                                                              | infection related              | 1.04 <sup>h</sup> (0.80–1.35) |                     | 5             |
| Sharon [45] (2008–2009)       | Administration of any statin medication at the time blood culture was sampling and/or documentation of statin use as an outpatient before hospitalization if the bacteremic blood culture was drawn within 24 hrs of admission | infection related              | 0.79 <sup>h</sup> (0.55–1.12) |                     | 5             |
|                               |                                                                                                                                                                                                                                | in-hospital                    | 1.06 <sup>f</sup> (0.62–1.81) | 1, 2, 4, 5, 9, 18   | 8             |
|                               |                                                                                                                                                                                                                                | 90-days                        | 0.99 <sup>b</sup> (0.77–1.25) | 1, 2, 3, 5, 15, 18  | 8             |
| GISSI [46] (2002–2008)        | Rosuvastatin 10 mg v placebo                                                                                                                                                                                                   | infection related              | 0.86 <sup>g</sup> (0.66–1.12) |                     | 5             |
| Wanner [47] (2000–2004)       | Atorvastatin 20 mg v placebo                                                                                                                                                                                                   | infection related              | 1.50 <sup>h</sup> (0.77–2.95) |                     | 5             |
| Holdaas [48] (1997–2003)      | Fluvastatin 40 mg v placebo                                                                                                                                                                                                    | infection related              | 0.91 <sup>h</sup> (0.65–1.26) |                     | 5             |
| Serruys [49] (1996–1998)      | Fluvastatin 80 mg v placebo                                                                                                                                                                                                    | infection related              | 0.97 <sup>h</sup> (0.61–1.55) |                     | 4             |
| Stegmayr [50] (1998–2000)     | Atorvastatin 10 mg v placebo                                                                                                                                                                                                   | infection related              | 0.33 <sup>h</sup> (0.03–3.16) |                     | 5             |
| Michael B. [51] (2003–2005)   | at least one dose of any HMG-CoA reductase inhibitor on hospital day 1 or 2                                                                                                                                                    | mortality of sepsis            | 0.57 <sup>h</sup> (0.18–1.95) |                     | 4             |
|                               |                                                                                                                                                                                                                                | In-hospital                    | 0.86 <sup>f</sup> (0.79–0.93) | 1, 2, 3, 4, 5, 7, 8 | 9             |

Table 2. Cont.

| Author                          | Exposure                                                                                                                                                                                | Mortality outcome            | Adjusted OR/HR (95% CI)                                        | Adjust confounders    | Quality score |
|---------------------------------|-----------------------------------------------------------------------------------------------------------------------------------------------------------------------------------------|------------------------------|----------------------------------------------------------------|-----------------------|---------------|
| Nielsen [52] (1997–2009)        | Current use: at least one filled prescription with in 125 days of the pneumonia hospitalization/index date<br>Former use: filled a prescription more than 125 days before hand          | 30 days                      | 0.73 <sup>a</sup> (0.67–0.79)<br>0.91 <sup>†</sup> (0.80–1.03) | 1, 2, 3, 5, 6, 16, 17 | 9             |
| Vandermeer [53] (2007–2008)     | Prior use: had a statin medication mentioned in their admission history and physical<br>Continued use: had any record of statin administration at any time during their hospitalization | Within 7 days                | 0.46 (0.23–90)                                                 | 1, 3, 13, 18, 21      | 8             |
|                                 |                                                                                                                                                                                         | Within 14 days               | 0.51 (0.30–88)                                                 |                       |               |
|                                 |                                                                                                                                                                                         | Within 21 days               | 0.60 (0.37–97)                                                 |                       |               |
|                                 |                                                                                                                                                                                         | Within 30 days               | 0.59 <sup>a</sup> (0.38–92)                                    |                       |               |
| Brett [54] (2009–2010)          | Recorded in the case note current drug history                                                                                                                                          | Influenza related            | 0.72 (0.38–1.33)                                               | 1, 2, 10, 15          | 8             |
| Sever [55] (2000–2010)          | Atorvastatin 10 mg v placebo                                                                                                                                                            | Infection/respiratory        | 0.64 <sup>h</sup> (0.42–0.97)                                  |                       | 5             |
|                                 |                                                                                                                                                                                         | Infection                    | 0.60 <sup>h</sup> (0.36–1.02)                                  |                       |               |
|                                 |                                                                                                                                                                                         | respiratory                  | 0.72 <sup>h</sup> (0.36–1.44)                                  |                       |               |
| Mortensen 2009 [56] (1998–2000) | Given medication if their last filled prescription included enough pills to last until the date of hospitalization                                                                      | 30-days                      | 0.51 <sup>a</sup> (0.41–0.64)                                  | 1, 2, 5, 6, 17, 18    | 9             |
|                                 |                                                                                                                                                                                         | 90-days                      | 0.51 <sup>b</sup> (0.40–0.64)                                  |                       |               |
| Makris [57] (2008–2010)         | pravastatin sodium, 40 mg v placebo                                                                                                                                                     | 30-days ICU treatment period | 0.48 <sup>ah</sup> (0.21–1.09)                                 |                       | 4             |

**Outcome:** a. 30-day mortality, b. 90-day mortality, c. all-cause mortality in influenza seasons, d. long-term mortality, e. Death attributable to Bacteremia, f. in-hospital mortality, g. mortality for sepsis, h. OR is calculated by events.

**Exposure:**

\*current exposure.

<sup>†</sup>recent or former exposure.

\*Past exposure.

<sup>†</sup>prior use.

◇ continued use.

**Adjusted confounders:** 1. Age, 2. Gender, 3. comorbid diseases, 4. smoking, 5. other drugs (antibiotics, aspirin, immunosuppressive agent, Angiotensin inhibitors, angiotensin-converting enzyme), 6. Charlson Comorbidity Index, 7. severity of disease, 8. other treatment in hospital, 9. APACHE score, 10. Crises signs, 11. time in ICU, 12. type of infection, 13. vaccine inoculation, 14. other library test data, 15. BMI, 16. alcohol drinking, 17. marital status, 18. race, 19. effect of health, 20. mental state, 21. antiviral initiation.

doi:10.1371/journal.pone.0051548.t002

of inclusion and exclusion criteria as well as the stability of included studies. We assessed potential publication bias with Egger precision weighted linear regression tests and funnel plots [35].

## Results

We identified 1499 potential eligible articles at the initial search. Among them, there are 41 ones [2,4–7,13–17,22–30,36–57] met our inclusion and exclusion criteria (Figure 1), including 1 surveillance study, 2 case-control study, 19 respective cohort studies, 9 prospective cohort studies and 10 RCTs. Stratified by types of infection, 16 focused on pneumonia [4,7,14,16,17,22,25,27,29,37,38,51–54,56], 6 on bacteremia [5,6,15,26,36,45], 7 on sepsis [2,13,23,30,40,44,50], and 12 on other infection [24,28,39,41–43,46–49,55,57]. Stratified by study locations, 20 studies were conducted in North America, 16 in Europe, 1 in Oceania, 2 in Asia, and 2 others cross continents. The average age of patients in these studies ranged from 40 to 75 years (Table 1).

According to NOS, the 30 included observational studies were rated as excellent or good quality (score range, 7–9; mean, 8.15) (Table 2). According to Jadad scale, the 10 included clinical trials were rated as high quality (score range, 4–5; mean, 4.7), which represented good quality of these studies.

The OR for death (statins use vs. no use) reported in the included studies ranged from 0.06 to 1.50 (Table 2). Twenty three studies found a protective effect of statins against death from infection, but the other 18 studies found null effects. There was substantial heterogeneity across the 41 studies ( $I^2$  value, 74%), which supported the use of random effect model for meta-analysis. The overall pooled OR was 0.71 (95% CI: 0.64, 0.78) (Figure 2). Table 3 shows the subgroup-specific pooled ORs and their 95% CIs. Stratified by study design, the 10 RCTs showed null effect of statins (pooled OR, 0.83 [0.67, 1.04]), whereas the observational studies found beneficial effects: the subgroup-specific pooled ORs were 0.58 (0.38, 0.90) for the case-control study, 0.66 (0.57, 0.75) for retrospective cohort studies, and 0.71 (0.57, 0.89) for prospective cohort studies, respectively (Table 3). Stratified by types of infection, the protective effect of statins in bacteremia patients was stronger than other types of infections: the subgroup-specific pooled ORs were 0.40 (0.20, 0.78) for bacteremia, 0.61 (0.41, 0.90) for sepsis, 0.69 (0.62, 0.78) for pneumonia, and 0.86 (0.68, 1.09) for other infections, respectively (Figure 2). Stratified by types of outcome, the subgroup-specific pooled ORs were 0.62 (0.54, 0.72) for 30-day mortality, 0.68 (0.53, 0.89) for 90-day mortality, 0.71 (0.61, 0.83) for in-hospital mortality and 0.86 (0.70, 1.07) for long-term mortality, respectively (Figure S1, S2, S3, S4, S5). Stratified by the quality of individual study, the pooled OR were 0.67 (0.59, 0.75) for observational studies rated as 8–9 score and 0.36 (0.18, 0.70) for studies rated as 7 score. Stratified by study locations, the pooled OR were 0.74 (0.65, 0.84) for studies in North America, 0.66 (0.57, 0.77) for studies in Europe, 0.06 (95%CI: 0.01, 0.47) for the study in Oceania, and 0.76 (95%CI: 0.38, 1.53) for studies in Asia, 0.93 (0.59, 1.46) for studies cross continents (Table 3).

There was substantial degree of heterogeneity across the included 41 studies ( $I^2$  statistic, 74%). The  $I^2$  statistic did not change considerably in the subgroup analyses based on total quality score, or subcategories of the quality score, i.e. exposure definition, outcomes, and confounding assessment. But the  $I^2$  statistic was as low as 41% and 55% for clinical trials and studies in Europe, respectively. In our sensitivity analysis, there was no significant change in pooled OR when excluding any of the studies (data not shown) or any group of studies by infection type. Another sensitivity analysis showed that 938 negative studies were needed for getting the opposite association between statins and mortality

in patient with infectious disease ( $N$ s = 938) and tolerance level was 103. Our Egger precision weighted linear regression tests showed the existence of publication bias ( $P$ -value <0.0001). Funnel plot also showed the absence of small studies in which statins might increase infectious disease-related mortality (Figure 3).

## Discussion

In this meta-analysis, we systematically reviewed 41 studies published during 2001–2012 on the association between statins use and infectious disease-related mortality. Overall, most observational studies found that statins were associated with lower mortality from infectious disease. Our pooled OR among these observational studies was similar to those in 3 previous meta-analyses by Tleyeh et al. [18], Surinder Janda et al. [20] and Bjorkhem et al [21]. However, we did not find conclusive evidence on this beneficial effect in clinical trials. In subgroup analysis, statins use was associated with lower 30-day, 90-day, and in-hospital mortality, but not with long-term mortality. Statins use was associated with lower mortality from bacteremia, pneumonia, and sepsis, but not with mortality from other infections and intensive care unit (ICU) patients.

We found that the magnitude of the association between statins use and infectious disease-related mortality tended to decrease with time, i.e. strongest for 30-day mortality followed by 90-day mortality and in-hospital mortality, and null for long-term mortality. This time trend suggests that the beneficial effect (if exists) of statins to lower infectious-disease related mortality may be short-term only. However, this time trend should be interpreted with caution due to potential misclassification of death outcome based on medical records, especially for in-hospital mortality. The substantial variation in hospitalization length posed a big challenge on estimating and interpreting pooled effect size of statins use, which can be confirmed by heterogeneity test within hospitalization period subgroup ( $I^2$  is 78%,  $P$ <0.0001).

We also found the magnitude of the association between statins use and mortality was strongest in patients with bacteremia. This suggests that the protective effect of statins may be superior for bacteremia than other types of infection. Alternatively, this may be partially explained by less use of antibiotics in patients with bacteremia: only 1 out of 6 studies on bacteremia patients, reported antibiotics use before the admission to hospital or during hospital, compared with most studies among patients with other types of infections (such as 100% in Kwong study and 20% in Yende study).

In this analysis, we found the reported effects of statins use varied strikingly by study design. Observational studies consistently supported the beneficial effect of statins in lowering infection disease mortality, while all RCTs showed null effects. Though RCTs often provide more valid results, these 10 RCTs can not completely outweigh the evidence on the beneficial effect of statins from observational studies. These “null-effect” RCTs are often criticized for small sample size [58]. These criticisms usually are based on two factors. Firstly, the formal sample size calculations that compute the numbers of patients required prospectively, as if the trial had not yet been carried out. Secondly, the true power calculated when trial is over. Based on alpha level, sample size and actual rates of primary events among control and experimental patients, we did post-hoc analysis by re-calculating the power of 8 negative trials in 10 RCTs and found that only one trial’s retrospective power is bigger than 80% (Serrugs 81.5%), and all other 7 ones had power smaller than 80% (Fellstrom 8.9%, Kjekshus 25.5%, Wanner 14.3%, Stegmayr 47.3%, Holdaas 70.9%, Makris 60.5%). This under-power might be caused by the

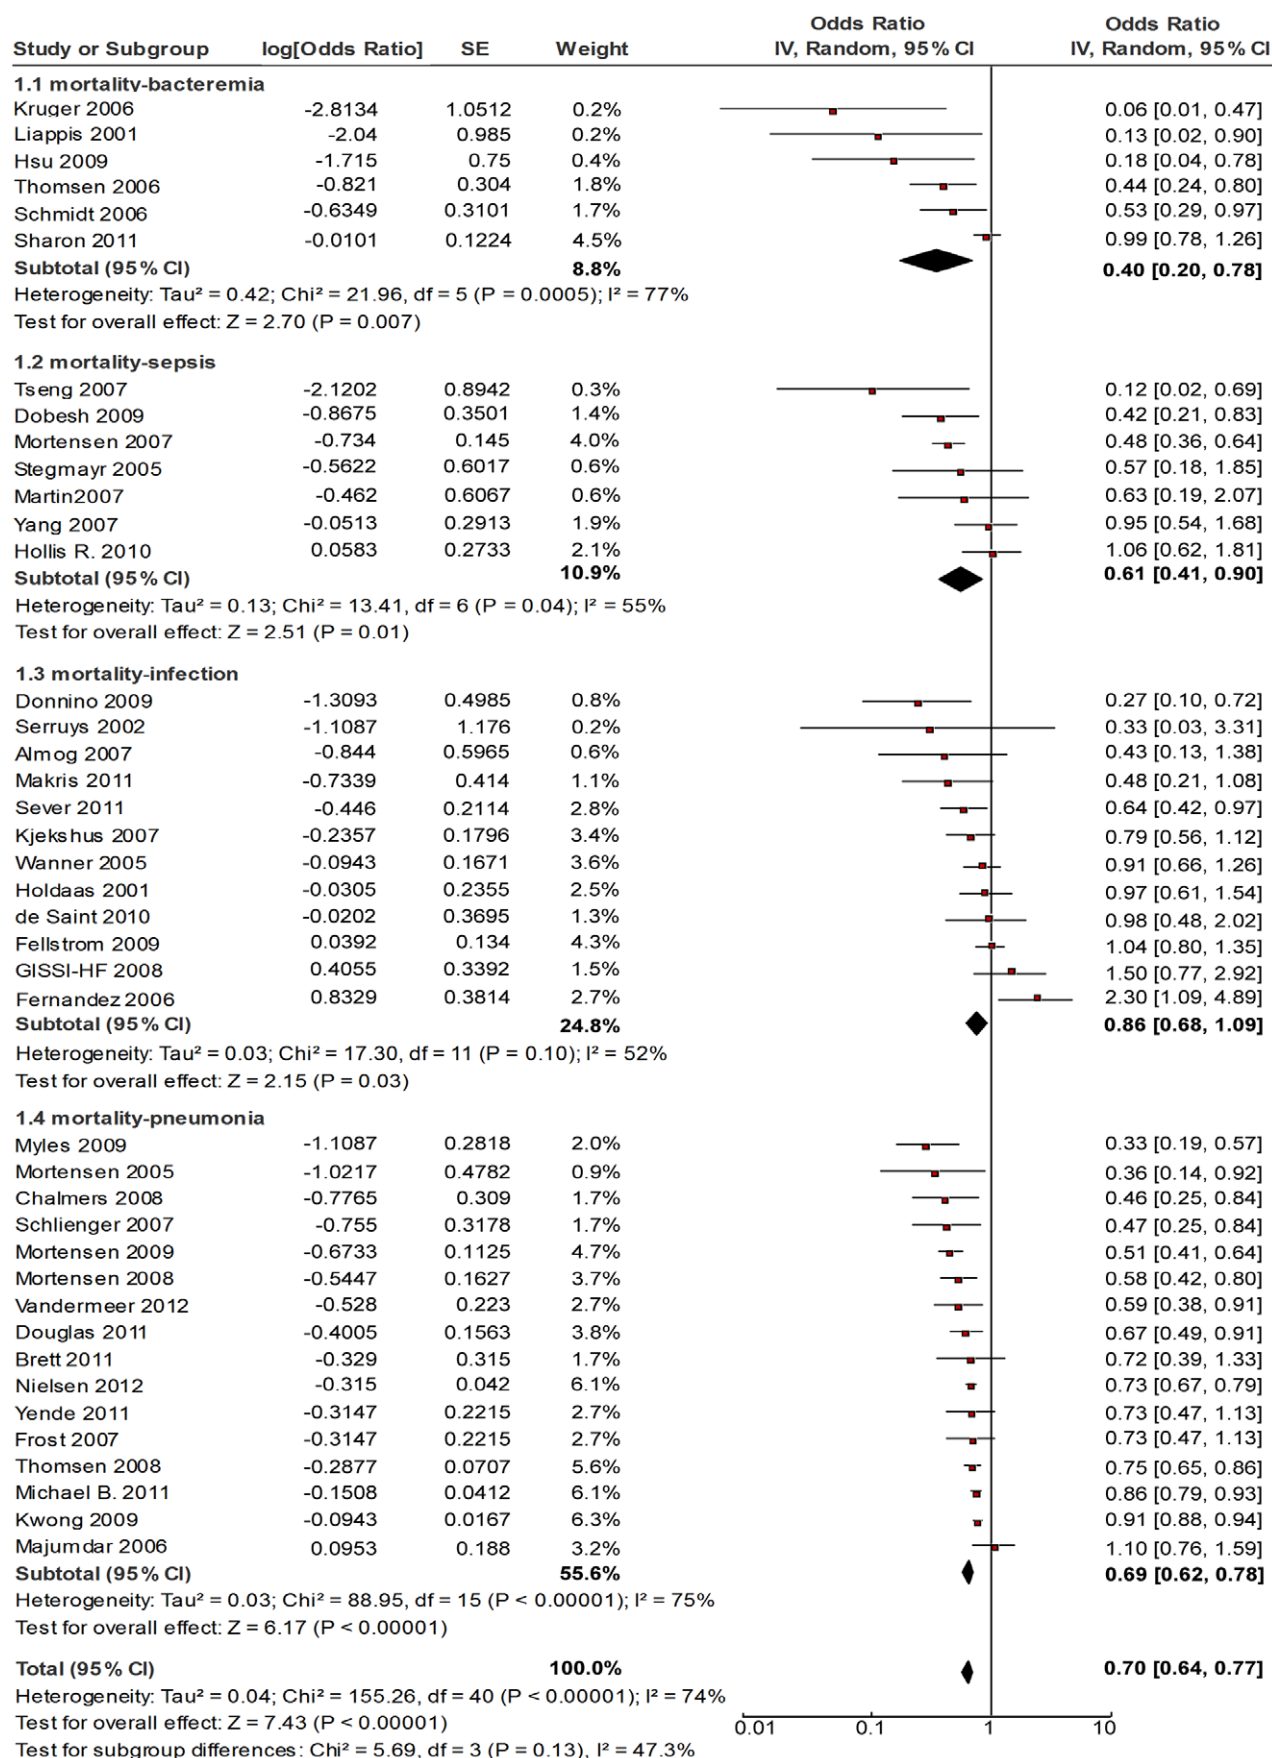

**Figure 2. Forest plot of the association between statins and mortality for patients with infectious disease, by types of infection.**

Note: Each comparison was presented by the name of the first author and the year of the publication. The studies were shown by a point estimate of the OR and the accompanying 95% CI which were displayed on a logarithmic scale using a random effects model. The studies are sorted according to the estimate of OR. Between-study heterogeneity was tested by the  $\chi^2$ -based Q-statistic, and its impact was quantified by  $I^2$  which can range between 0 and 100%.

doi:10.1371/journal.pone.0051548.g002

over-estimated event rate in control group and/or risk reduction level. In these 7 trials, investigator assumed the statins may reduce the risk of primary outcome by 20% to 50%, but the truth is the observed related risk reduction is obviously lower than 20% except for Makris study. This result indicated that the evidence to make a negative conclusion of statins is not sufficient and suggested retrospective sample size calculation is needed so as to add more representative patients in the trial. The sample size recalculation also showed that we still need 3–10 times of current number in each RCT to get positive result. Beside that, almost all these RCTs enrolled the patients who had existing cardiovascular disease. This could lead to misclassification of infection-related death, because of the difference between the primary and secondary infection. In addition, infection-related mortality is not a primary outcome in these studies on cardiovascular outcomes, and thus might not be measured accurately or appropriately.

Unexpectedly, we did not find significantly protective effect of statins against infection-related death in the 9 studies that focused on severe patient or patients admitted to ICU [7,23,26,28,36,39,40,51,57] respectively in bacteremia (0.38, 0.15–1.01), in sepsis (0.65, 0.29–1.44), in pneumonia (0.95, 0.84–1.07), but not in other infections subgroup (0.64, 0.44–

0.92). One explanation can be that those severe patients usually have many severe complications [26,39]. These complications often lead to adverse outcome and significantly increase the risk of death, which may dim the moderate protective effects of statins. Most interested us is that the result from only one clinical trial in these 9 studies provided evidence supporting that statins might affect the course of critically ill patients and decrees the ICU mortality [57]. Considering the differences in study design and implement between the observational studies and clinical trials, the most probable reason for this opposite result is the opportune moment of using statins. Patients in the observational studies might have already been using statins to treat high cholesterol (prevalent users). In clinical trials, however, statins were randomized to two groups after patients being recruited (new users). Another reason is the time difference between the progresses of critically ill and the onset time of statins. The immunomodulatory effects of statins can occur within 24 hours and thus acute treatment may down-regulate the level of pro-inflammatory cytokines [59]. That is why the acute curative effect in clinical trial is better than long-term effect in observational studies. These findings suggest that long-term use of statins may not be able to protect severe ICU patients against death from infection as common or less severe patients. However, we need more evidence from RCTs to confirm the acute effect of statin in reducing the ICU mortality among ICU patient.

The moderate heterogeneity across the included 41 studies may come from 2 main sources: study population and methodology. The significantly lower  $I^2$  statistics in Europe studies than that in studies from other continents revealed the substantial difference in study population (e.g. ethnics and study locations), especially for limited source from Asia and Oceania population. For methodology, the low  $I^2$  statistics in clinical trials indicated better quality control and more reliable results than observational studies. Other methodological heterogeneity included type of patients, type of infection, and dose of statins use across different studies.

### Study Strengths

This meta-analysis had several strengths. First, we included much more RCTs than previous reviews (8 vs. 0 in Tleyjeh et al.'s, 0 in Kopterides', 0 in Bjorkhem and 1 in Janda et al.'s). Inclusion of these RCTs can substantially improve the validity of our analysis. Secondly, we conducted subgroup analyses by 4 important factors, i.e. study design, types of infections, outcome measures, and study locations. These subgroups analyses can help us to better assess the sources of variation or inconsistency of findings, and also better understand the specific subgroups of patients that may benefit more or less from statins. Thirdly, we assessed the quality of each study by well-established score scales (NOS and Jadad Score). The relatively high quality of most included studies can improve our interpretation of the pooled effect estimates for statins use.

### Study Limitations

Several limitations of this meta-analysis needed to be mentioned. First, we only included electronic database and published articles. Both Egger's test and asymmetry of funnel plot potential suggested the existence of publication bias. Second, this meta-

**Table 3. Subgroup analyses by study design, types of infection, outcome measures and study location.**

|                            | n  | Pooled OR | 95% CI       | Heterogeneity ( $I^2$ ) |
|----------------------------|----|-----------|--------------|-------------------------|
| <b>Study design</b>        |    |           |              |                         |
| Surveillance               | 1  | 0.59      | (0.38–1.33)  | –                       |
| Retrospective cohort study | 19 | 0.66      | (0.57, 0.75) | 82%                     |
| Prospective cohort study   | 9  | 0.71      | (0.57, 0.89) | 53%                     |
| Case-control study         | 2  | 0.58      | (0.38, 0.90) | 0%                      |
| Clinical trial             | 10 | 0.83      | (0.67, 1.04) | 41%                     |
| <b>Type of infection</b>   |    |           |              |                         |
| Bacteremia                 | 6  | 0.40      | (0.20, 0.78) | 77%                     |
| Sepsis                     | 7  | 0.61      | (0.41, 0.90) | 55%                     |
| Pneumonia                  | 16 | 0.69      | (0.62, 0.78) | 75%                     |
| Other infection            | 12 | 0.86      | (0.68, 1.09) | 52%                     |
| <b>Outcome measure</b>     |    |           |              |                         |
| 30-day mortality           | 15 | 0.62      | (0.54, 0.72) | 77%                     |
| 90-day mortality           | 5  | 0.68      | (0.53, 0.89) | 75%                     |
| In-hospital mortality      | 18 | 0.71      | (0.61, 0.83) | 78%                     |
| Long-term mortality        | 9  | 0.86      | (0.70, 1.07) | 39%                     |
| <b>Study location</b>      |    |           |              |                         |
| North America              | 20 | 0.74      | (0.65, 0.84) | 78%                     |
| Europe                     | 16 | 0.66      | (0.57, 0.77) | 55%                     |
| Australia                  | 1  | 0.06      | (0.01, 0.47) | –                       |
| Asia                       | 2  | 0.76      | (0.38, 1.53) | 30%                     |
| Cross continents           | 2  | 0.93      | (0.59, 1.46) | 0%                      |

doi:10.1371/journal.pone.0051548.t003

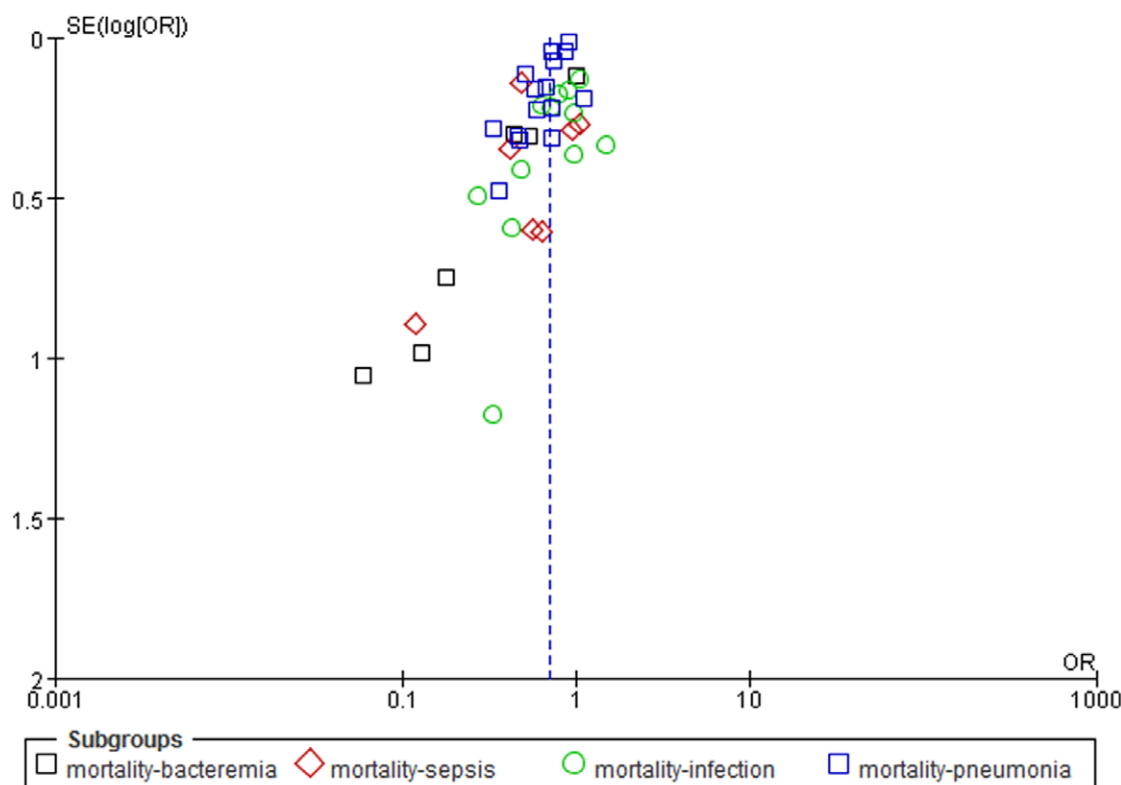

**Figure 3. Funnel plot of the association between statins and mortality for patients with infectious disease, by types of infection.**  
doi:10.1371/journal.pone.0051548.g003

analysis included more observational studies ( $n = 31$ ) than clinical trials ( $n = 10$ ). We did not assign different weighting to included studies based on the validity of their study design (RCT vs. observational studies). Third, 6 of the 10 included RCTs were designed to test the effect of statins on cardiac outcomes rather than infectious disease-related mortality. So the validity of estimated associations from these RCTs may be comprised. Fortunately, several ongoing clinical trials [60–63] (ID: NCT00528580, NCT00979121, NCT00702130, NCT00676897, <http://www.clinicaltrials.gov>) aim to specifically examine the potential clinical benefit of statins in sepsis. We expect these studies will yield more conclusive evidence on this important topic in near future.

## Conclusion

Based on this meta-analysis, we conclude that statins are associated with a lower risk of death in patients with infectious diseases in observational studies, but less in clinical trials. This beneficial effect tends to be short-term only. It seems to be stronger in patients with bacteremia but less for ICU patients with severe infection. More worldwide clinical trials specifically on this topic are urgently needed to provide more conclusive guideline for clinical practice.

## Supporting Information

### Checklist S1 PRISMA Checklist. (DOC)

**Figure S1 Forest plot of the association between statins and mortality (30-days) for patients with infectious disease.**  
(TIF)

**Figure S2 Forest plot of the association between statins and mortality (90-days) for patients with infectious disease.**  
(TIF)

**Figure S3 Forest plot of the association between statins and mortality (in-hospital) for patients with infectious disease.**  
(TIF)

**Figure S4 Forest plot of the association between statins and mortality (long term) for patients with infectious disease.**  
(TIF)

**Figure S5 Forest plot of the association between statins and mortality for patients with infectious disease, by study area.**  
(TIF)

**Flow Diagram S1 PRISMA Flow Diagram.**  
(DOC)

## Acknowledgments

The authors sincerely appreciate the valuable comments on our manuscript by Prof. Xia Guo in Hong Kong Polytechnic University.

## Author Contributions

Conceived and designed the experiments: YM XZW JHL JP ZMG. Performed the experiments: YM JP YL ZMG. Analyzed the data: YM XZW ZMG JHL. Contributed reagents/materials/analysis tools: YM JP YL. Wrote the paper: YM.

## References

- Angus DC, Linde-Zwirble WT, Lidicker J, Clermont G, Carcillo J, et al. (2001) Epidemiology of severe sepsis in the United States: analysis of incidence, outcome, and associated costs of care. *Crit Care Med* 29: 1303–1310.
- Martin GP, Talbert RL, Burgess DS, Peters JI (2007) Effectiveness of statins in reducing the rate of severe sepsis: a retrospective evaluation. *Pharmacotherapy* 27: 20–26.
- Speizer FE, Horton S, Batt J, Slutsky AS (2006) Respiratory Diseases of Adults.
- Frost FJ, Petersen H, Tollestrup K, Skipper B (2007) Influenza and COPD mortality protection as pleiotropic, dose-dependent effects of statins. *Chest* 131: 1006–1012.
- Kruger P, Fitzsimmons K, Cook D, Jones M, Nimmo G (2006) Statin therapy is associated with fewer deaths in patients with bacteraemia. *Intensive Care Med* 32: 75–79.
- Thomsen RW, Hundborg HH, Johnsen SP, Pedersen L, Sorensen HT, et al. (2006) Statin use and mortality within 180 days after bacteremia: a population-based cohort study. *Crit Care Med* 34: 1080–1086.
- Majumdar SR, McAlister FA, Eurich DT, Padwal RS, Marrie TJ (2006) Statins and outcomes in patients admitted to hospital with community acquired pneumonia: population based prospective cohort study. *BMJ* 333: 999.
- Falagas ME, Makris GC, Matthaiou DK, Rafailidis PI (2008) Statins for infection and sepsis: a systematic review of the clinical evidence. *J Antimicrob Chemother* 61: 774–785.
- Weitz-Schmidt G, Welzenbach K, Brinkmann V, Kamata T, Kallen J, et al. (2001) Statins selectively inhibit leukocyte function antigen-1 by binding to a novel regulatory integrin site. *Nat Med* 7: 687–692.
- Merx MW, Weber C (2006) Statins in the intensive care unit. *Curr Opin Crit Care* 12: 309–314.
- Novack V, Terblanche M, Almog Y (2006) Do statins have a role in preventing or treating sepsis? *Crit Care* 10: 113.
- McGown CC, Brookes ZL (2007) Beneficial effects of statins on the microcirculation during sepsis: the role of nitric oxide. *Br J Anaesth* 98: 163–175.
- Mortensen EM, Restrepo MI, Copeland LA, Pugh JA, Anzueto A, et al. (2007) Impact of previous statin and angiotensin II receptor blocker use on mortality in patients hospitalized with sepsis. *Pharmacotherapy* 27: 1619–1626.
- Mortensen EM, Pugh MJ, Copeland LA, Restrepo MI, Cornell JE, et al. (2008) Impact of statins and angiotensin-converting enzyme inhibitors on mortality of subjects hospitalised with pneumonia. *Eur Respir J* 31: 611–617.
- Liappis AP, Kan VL, Rochester CG, Simon GL (2001) The effect of statins on mortality in patients with bacteremia. *Clin Infect Dis* 33: 1352–1357.
- Myles PR, Hubbard RB, Gibson JE, Pogson Z, Smith CJ, et al. (2009) The impact of statins, ACE inhibitors and gastric acid suppressants on pneumonia mortality in a UK general practice population cohort. *Pharmacoepidemiol Drug Saf* 18: 697–703.
- Yende S, Milbrandt EB, Kellum JA, Kong L, Delude RL, et al. (2011) Understanding the potential role of statins in pneumonia and sepsis. *Crit Care Med* 39: 1871–1878.
- Teyjeh IM, Kashour T, Hakim FA, Zimmerman VA, Erwin PJ, et al. (2009) Statins for the prevention and treatment of infections: a systematic review and meta-analysis. *Arch Intern Med* 169: 1658–1667.
- Kopterides P, Falagas ME (2009) Statins for sepsis: a critical and updated review. *Clin Microbiol Infect* 15: 325–334.
- Janda S, Young A, Fitzgerald JM, Etminan M, Swiston J (2010) The effect of statins on mortality from severe infections and sepsis: a systematic review and meta-analysis. *J Crit Care* 25: 656–657.
- Bjorkhem-Bergman L, Bergman P, Andersson J, Lindh JD (2010) Statin treatment and mortality in bacterial infections—a systematic review and meta-analysis. *PLoS One* 5: e10702.
- Chalmers JD, Singanayagam A, Murray MP, Hill AT (2008) Prior statin use is associated with improved outcomes in community-acquired pneumonia. *Am J Med* 121: 1002–1007.
- Dobesh PP, Klepser DG, McGuire TR, Morgan CW, Olsen KM (2009) Reduction in mortality associated with statin therapy in patients with severe sepsis. *Pharmacotherapy* 29: 621–630.
- Donmino MW, Cocchi MN, Howell M, Clardy P, Talmor D, et al. (2009) Statin therapy is associated with decreased mortality in patients with infection. *Acad Emerg Med* 16: 230–234.
- Schlienger RG, Fedson DS, Jick SS, Jick H, Meier CR (2007) Statins and the risk of pneumonia: a population-based, nested case-control study. *Pharmacotherapy* 27: 325–332.
- Hsu J, Andes DR, Knasinski V, Pirsch J, Safdar N (2009) Statins are associated with improved outcomes of bloodstream infection in solid-organ transplant recipients. *Eur J Clin Microbiol Infect Dis* 28: 1343–1351.
- Mortensen EM, Restrepo MI, Anzueto A, Pugh J (2005) The effect of prior statin use on 30-day mortality for patients hospitalized with community-acquired pneumonia. *Respir Res* 6: 82.
- Almog Y, Novack V, Eisinger M, Porath A, Novack L, et al. (2007) The effect of statin therapy on infection-related mortality in patients with atherosclerotic diseases. *Crit Care Med* 35: 372–378.
- Thomsen RW, Riis A, Kornum JB, Christensen S, Johnsen SP, et al. (2008) Preadmission use of statins and outcomes after hospitalization with pneumonia: population-based cohort study of 29,900 patients. *Arch Intern Med* 168: 2081–2087.
- Tseng MY, Hutchinson PJ, Czosnyka M, Richards H, Pickard JD, et al. (2007) Effects of acute pravastatin treatment on intensity of rescue therapy, length of inpatient stay, and 6-month outcome in patients after aneurysmal subarachnoid hemorrhage. *Stroke* 38: 1545–1550.
- Hackam DG, Mamdani M, Li P, Redelmeier DA (2006) Statins and sepsis in patients with cardiovascular disease: a population-based cohort analysis. *Lancet* 367: 413–418.
- Newcastle-Ottawa Scale (NOS) for assessing the quality of nonrandomised studies in meta-analyses [EB/OL]. OHRI website. Available: [http://www.ohri.ca/programs/clinical\\_epidemiology/oxford.htm](http://www.ohri.ca/programs/clinical_epidemiology/oxford.htm). Accessed 2012 Nov 9.
- Jadad AR, Moore RA, Carroll D, Jenkinson C, Reynolds DJ, et al. (1996) Assessing the quality of reports of randomized clinical trials: is blinding necessary? *Control Clin Trials* 17: 1–12.
- Higgins JP, Thompson SG, Deeks JJ, Altman DG (2003) Measuring inconsistency in meta-analyses. *BMJ* 327: 557–560.
- Egger M, Davey SG, Schneider M, Minder C (1997) Bias in meta-analysis detected by a simple, graphical test. *BMJ* 315: 629–634.
- Schmidt H, Hennen R, Keller A, Russ M, Muller-Werdan U, et al. (2006) Association of statin therapy and increased survival in patients with multiple organ dysfunction syndrome. *Intensive Care Med* 32: 1248–1251.
- Douglas I, Evans S, Smeeth L (2011) Effect of statin treatment on short term mortality after pneumonia episode: cohort study. *BMJ* 342: d1642.
- Kwong JC, Li P, Redelmeier DA (2009) Influenza morbidity and mortality in elderly patients receiving statins: a cohort study. *PLoS One* 4: e8087.
- Fernandez R, De Pedro VJ, Artigas A (2006) Statin therapy prior to ICU admission: protection against infection or a severity marker? *Intensive Care Med* 32: 160–164.
- Yang KC, Chien JY, Tseng WK, Hsueh PR, Yu CJ, et al. (2007) Statins do not improve short-term survival in an oriental population with sepsis. *Am J Emerg Med* 25: 494–501.
- de Saint ML, Tande D, Goetghebuer D, Pan-Lamande M, Segalen Y, et al. (2010) Statin use does not affect the outcome of acute infection: a prospective cohort study. *Presse Med* 39: e52–e57.
- Fellstrom BC, Jardine AG, Schmieider RE, Holdaas H, Bannister K, et al. (2009) Rosuvastatin and cardiovascular events in patients undergoing hemodialysis. *N Engl J Med* 360: 1395–1407.
- Kjekshus J, Apetrei E, Barrios V, Bohm M, Cleland JG, et al. (2007) Rosuvastatin in older patients with systolic heart failure. *N Engl J Med* 357: 2248–2261.
- O'Neal HJ, Koyama T, Koehler EA, Siew E, Curtis BR, et al. (2011) Prehospital statin and aspirin use and the prevalence of severe sepsis and acute lung injury/acute respiratory distress syndrome. *Crit Care Med* 39: 1343–1350.
- Leung S, Pokharel R, Gong MN (2012) Statins and outcomes in patients with bloodstream infection: A propensity-matched analysis. *Crit Care Med*.
- Tavazzi L, Maggioni AP, Marchioli R, Barlera S, Franzosi MG, et al. (2008) Effect of rosuvastatin in patients with chronic heart failure (the GISSI-HF trial): a randomised, double-blind, placebo-controlled trial. *Lancet* 372: 1231–1239.
- Wanner C, Krane V, Marz W, Olschewski M, Mann JF, et al. (2005) Atorvastatin in patients with type 2 diabetes mellitus undergoing hemodialysis. *N Engl J Med* 353: 238–248.
- Holdaas H, Fellstrom B, Cole E, Nyberg G, Olsson AG, et al. (2005) Long-term cardiac outcomes in renal transplant recipients receiving fluvastatin: the ALERT extension study. *Am J Transplant* 5: 2929–2936.
- Serruys PW, de Feyter P, Macaya C, Kokott N, Puel J, et al. (2002) Fluvastatin for prevention of cardiac events following successful first percutaneous coronary intervention: a randomized controlled trial. *JAMA* 287: 3215–3222.
- Stegmayr BG, Brannstrom M, Bucht S, Crougneau V, Dimeny E, et al. (2005) Low-dose atorvastatin in severe chronic kidney disease patients: a randomized, controlled endpoint study. *Scand J Urol Nephrol* 39: 489–497.
- Rothberg MB, Bigelow C, Pekow PS, Lindanauer PK (2012) Association between statins given in hospital and mortality in pneumonia patients. *J Gen Intern Med* 27: 280–286.
- Nielsen AG, Nielsen RB, Riis AH, Johnsen SP, Sorensen HT, et al. (2012) The impact of statin use on pneumonia risk and outcome: a combined population-based case-control and cohort study. *Crit Care* 16: R122.
- Vandermeer ML, Thomas AR, Kamimoto L, Reingold A, Gershman K, et al. (2012) Association between use of statins and mortality among patients hospitalized with laboratory-confirmed influenza virus infections: a multistate study. *J Infect Dis* 205: 13–19.
- Brett SJ, Myles P, Lim WS, Enstone JE, Bannister B, et al. (2011) Pre-admission statin use and in-hospital severity of 2009 pandemic influenza A(H1N1) disease. *PLoS One* 6: e18120.
- Sever PS, Chang CL, Gupta AK, Whitehouse A, Poulter NR (2011) The Anglo-Scandinavian Cardiac Outcomes Trial: 11-year mortality follow-up of the lipid-lowering arm in the U.K. *Eur Heart J* 32: 2525–2532.
- Mortensen EM, Copeland LA, Pugh MJ, Restrepo MI, de Molina RM, et al. (2009) Impact of statins and ACE inhibitors on mortality after COPD exacerbations. *Respir Res* 10: 45.

57. Makris D, Manoulakas E, Komnos A, Papakrivou E, Tzovaras N, et al. (2011) Effect of pravastatin on the frequency of ventilator-associated pneumonia and on intensive care unit mortality: open-label, randomized study. *Crit Care Med* 39: 2440–2446.
58. Detsky AS, Sackett DL (1985) When was a “negative” clinical trial big enough? How many patients you needed depends on what you found. *Arch Intern Med* 145: 709–712.
59. Link A, Ayadhi T, Bohm M, Nickenig G (2006) Rapid immunomodulation by rosuvastatin in patients with acute coronary syndrome. *Eur Heart J* 27: 2945–2955.
60. Statin Therapy in the Treatment of Sepsis. ClinicalTrials website. Available: <http://www.clinicaltrials.gov/ct2/show/NCT00676897?term=statin+AND+infection&rank=37>. Accessed 2012 Nov 9.
61. Pravastatin and Ventilatory Associated Pneumonia (EPRAVAP). ClinicalTrials website. Available: <http://www.clinicaltrials.gov/ct2/show/NCT00702130?term=statin+AND+infection&rank=39>. Accessed 2012 Nov 9.
62. Statins for Acutely Injured Lungs From Sepsis (SAILS). ClinicalTrials website. Available: <http://www.clinicaltrials.gov/ct2/show/NCT00979121?term=statin+AND+infection&rank=53>. Accessed 2012 Nov 9.
63. Statins for the Early Treatment of Sepsis (SETS). ClinicalTrials website. Available: <http://www.clinicaltrials.gov/ct2/show/NCT00528580?term=statin+AND+infection&rank=11>. Accessed 2012 Nov 9.
